# Supplementary material for: Understanding Dutch practice nurses' adherence to evidence-based smoking cessation guidelines and their needs for web-based adherence support: results from semistructured interviews
Source: PubMed Central journal article supplement — BMJ Open. 2017 Mar 22;7(3):e014154. doi: 10.1136/bmjopen-2016-014154 (PMC5372119; doi:10.1136/bmjopen-2016-014154), 2017-03-22
Supplement: bmjopen-2016-014154supp_appendix.pdf [file bmjopen-2016-014154supp_appendix.pdf]

## Appendix 1: semi-structured interview guide

### Personal and practice characteristics

**What is your age?**

**Do you currently smoke or have you been a smoker in the past?**

**What education did you complete in order to work as a practice nurse?**

**How many years of working experience do you have as a practice nurse?**

**At how many practices are you employed as a practice nurse?**

*In-depth question (if applicable): how many hours do you work in these practices?*

**What is the size of the practice(s), in terms of patients and employees?**

*Prompt questions*

- How many patients visit the practice every year?
- How many primary care professionals are employed at the practice?

**Would you classify the practice(s) as rural or urban?**

### Current smoking cessation counseling

**Main question: What does your current practice as a smoking cessation counselor look like?**

*Prompt questions*

- What role does the general practitioner have?
- What role do you have?
- When are patients eligible for counseling?
- How are patients approached to initiate counseling?

*In-depth question: which elements does your smoking cessation counseling include?*

- Providing quit advice
- Assessing smoking profile
- Increasing motivation, discussing pros and cons
- Dealing with difficult situations and barriers
- Discussing available smoking cessation aids
- Setting a quit date
- Planning follow-up meetings after quit date

*Follow-up questions*

- In case some elements are not conducted:
  - What reasons do you have for not addressing ...?
  - What would make it easier for you to address ...?
- What protocol or guideline do you use during counseling, if any?
- Who made the decision to use this protocol or guideline?
- What course did you attend about this protocol or guideline, if any?
- Which educational materials do you refer to during counseling, if any?
- How do you rate the quality of your current counseling?
  - Which aspects are particularly well developed?
  - Which aspects could be improved?
  - What do patients think about your counseling?

### STIMEDIC® smoking cessation guideline\*

**Main question: What is your opinion of the STIMEDIC® guideline for counseling?**

*Prompt questions*

- What elements do you find particularly well-developed?
  - Which elements could be difficult to apply in practice?
  - How do you deal with difficult situations in practice?
-

- 
- What would be reasons to use the STIMEDIC® guideline? Why not?

Web-based CT support program\*\*

**Main questions:**

**Why would you (not) be interested in a tailored web-based support program to help you to improve smoking cessation counseling?**

**What should the content and design of this program look like so you would make use of it?**

*Prompt questions*

- How much time are you willing to spend on using the program?
- In what format would you like to receive your tailored advice?
- What design features should the support program have?
- What type of content should the advice contain?
- In case an online forum is available, what possibilities should this provide for you?
- In case accreditation points are rewarded for using the program, would this affect your use of the program?
- What other materials or forms of support would you need to improve your smoking cessation counseling?

---

\* Prior to the questions about the STIMEDIC® guideline, PNs were informed about the different steps of the guideline

\*\* Prior to the questions about the web-based CT support program, PNs were informed about the functionalities and relevance of such a program
